## 1 Title

2 Rewiring cattle movements to limit infection spread.

## 3 Authors

4 Thibaut Morel-Journal<sup>a\*</sup>, Pauline Ezanno<sup>a</sup>, Elisabeta Vergu<sup>b</sup>

## 5 Affiliations

6 a: INRAE, Oniris, BIOEPAR, 44300, Nantes, France

7 b: INRAE, Université Paris-Saclay, MaIAGE, 78350, Jouy-en-Josas, France

## 8 Corresponding author

9 \*Thibaut Morel-Journal: [thibaut.moreljournal@gmail.com](mailto:thibaut.moreljournal@gmail.com)

## 10 Abstract

11 The cattle tracing databases set up over the past decades in Europe have become major resources for  
12 representing demographic processes of livestock and assessing potential risk of infections spreading by  
13 trade. The herds registered in these databases are parts of a network of commercial movements, which  
14 can be altered to lower the risk of disease transmission. In this study, we developed an algorithm aimed at  
15 reducing the number of infected animals and herds, by rewiring specific movements responsible for trade  
16 flows from high- to low-prevalence herds. The algorithm was coupled with a generic computational model  
17 describing infection spread within and between herds, based on data extracted from the French cattle  
18 movement tracing database (BDNI). This model was used to simulate a wide array of infections, with  
19 either a recent outbreak (epidemic) or an outbreak that occurred five years earlier (endemic), on which the  
20 performances of the rewiring algorithm were explored. Results highlighted the effectiveness of rewiring  
21 in containing infections to a limited number of herds for all scenarios, but especially if the outbreak was  
22 recent and if the estimation of disease prevalence was frequent. Further analysis revealed that the key  
23 parameters of the algorithm affecting infection outcome varied with the infection parameters. Allowing  
24 any animal movement from high to low-prevalence herds reduced the effectiveness of the algorithm in  
25 epidemic settings, while frequent and fine-grained prevalence assessments improved the impact of the  
26 algorithm in endemic settings. Overall, our approach, which focuses on a few commercial movements,  
27 has led to substantial improvements in the control of a targeted disease, although changes in the network

28 structure should be monitored for potential vulnerabilities to other diseases. Due to its generality, the  
29 developed rewiring algorithm could be applied to any network of controlled individual movements liable  
30 to spread disease.

## 31 **Keywords**

32 Control strategy; Epidemiology; Data-based; Network; Stochastic model

## 33 **Abbreviation**

34 BDNI: *Base de données nationale d'identification animale*

## 35 **Introduction**

36 Following bovine spongiform encephalopathy and classical swine fever epidemics in the 1990s, the Euro-  
37 pean Union initiated the mandatory identification and registration of cattle in Europe (EU, 2000). This  
38 decision led to the creation of national identification databases, such as the cattle tracing system in the  
39 United Kingdom (Kao et al., 2006, Vernon, 2011), the French national bovine identification database  
40 (BDNI) (Rautureau et al., 2011, Dutta et al., 2014), the Italian national bovine database (Natale et al.,  
41 2009, Bajardi et al., 2011) and the database of the Swedish board of agriculture (Nöremark et al., 2009,  
42 2011). These animal tracing systems have enabled the monitoring of infectious livestock diseases and  
43 the development of strategies to prevent their spread (Gilbert et al., 2005, Moslonka-Lefebvre et al.,  
44 2016, Beaunée et al., 2017), since animal trade is a major transmission pathway between herds. Indeed,  
45 commercial exchanges are not only recorded comprehensively, but also controlled by farmers, unlike an-  
46 imal mobility in the wild. These databases, whose reliability has increased over time since their creation  
47 (Green and Kao, 2007), are therefore powerful tools for simulating infectious diseases in cattle (Ezanno  
48 et al., 2020) and assessing the impact of livestock movements on epidemics (Ezanno et al., 2021).

49 The information provided by these commercial animal movements can be used as a basis for repre-  
50 senting comprehensively the demographic processes and trades between cattle farms located in a given  
51 region, using a metapopulation framework (Liu et al., 2007, Courcoul and Ezanno, 2010). To this end,  
52 disease transmission between individuals within a defined set of herds can be modelled, by combining an  
53 epidemiological model with existing data on births, deaths and movements. This type of models accounts  
54 at least for two ways of spreading the infection: by contact within a herd, or by actually moving animals  
55 between herds. This is for instance the case for paratuberculosis, a cattle disease mainly spread by trade  
56 (Beaunée et al., 2015, Biemans et al., 2021). Manipulating the structure of cattle movement is expected  
57 to have a direct impact on the latter and an indirect impact on the former.

58 The structure of these trade movements can be understood through the prism of graph theory: herds  
59 are the vertices of a commercial exchange network, whose edges are the movements of livestock (Dubé  
60 et al., 2009). Thus, each herd can be characterized using graph metrics, e.g. its in- and out-degree, i.e.  
61 the number of herds it has respectively bought animals from and sold animals to. Network-based control  
62 strategies then aim to modify the structure of the network to reduce infection risks. Removing vertices  
63 (Rautureau et al., 2011, Büttner et al., 2013) or edges (Yang et al., 2013, Green et al., 2009) through  
64 trade ban or slaughtering is often considered to slow down epidemics. In a context of cattle exchange  
65 however, preventing farmers from buying or selling livestock entails high economic costs. Therefore, this  
66 strategy cannot be used routinely, and is likely better suited to the management of regulated diseases,  
67 the consequences of which are also very costly.

68 Edge rewiring is a less radical approach able to balance the trade-off between health risks and economic  
69 costs. This method corresponds to the modification of one or both vertices that an edge connects (Gross  
70 et al., 2006, Piankoranee and Limkumnerd, 2020, Britton et al., 2016, Ball and Britton, 2020). Although  
71 most of the theoretical literature on the subject rather considers rewiring in the context of human contact  
72 networks, it has also been used to study epidemic spread in cattle movement networks (Gates and  
73 Woolhouse, 2015, Mohr et al., 2018, Ezanno et al., 2021). For instance, Gates and Woolhouse (2015)  
74 present a rewiring method that creates an entirely new movement network disconnecting large buyers  
75 from large sellers, while retaining the total number of animals bought or sold by each herd. This method  
76 requires information at the network level, the criteria used being the distributions of in- and out-degrees  
77 of all vertices. Global-level information is also generally required for most rewiring methods in contact  
78 networks, although Piankoranee and Limkumnerd (2020) proposed a method based on local information.  
79 In their study, rewiring is decided at the vertex level, according to its status and those of its direct  
80 neighbours. Controlling cattle movements depending on the sanitary status of their origin has been  
81 proposed in previous studies, e.g. by Hidano et al. (2016). Their study presents different scenarios  
82 regarding farmers' practices, especially their tendency to avoid buying cattle from regions with a higher  
83 incidence of bovine tuberculosis. The approach presented here is similar, albeit at a finer grain: preventing  
84 farmers from buying cattle from herds with a higher prevalence of the target disease.

85 This study presents a new rewiring method to reduce the spread of infections in a cattle movement  
86 network. To do this, we developed a rewiring algorithm in conjunction with a simulation model. The  
87 simulation model coupled demography based on a dataset from the French cattle tracing system (BDNI)  
88 with a SIRS epidemiological model. The use of such a generalist epidemiological model made it possible  
89 to simulate a wide range of epidemiological settings, only by varying its parameters. The algorithm  
90 worked by preventing movements from high- to low-prevalence herds, while maintaining the number of  
91 animals bought and sold by each farm. It was based on an edge-level criterion: the estimated difference  
92 in prevalence between the herd of origin and the herd of destination of the movement considered. The

93 following presents the cattle movement network concerned by this study, as well as the model and the  
94 algorithm. Then, we consider various outputs of runs of the model with or without rewiring, concerning  
95 the the functioning of the algorithm itself, its impact on the propagation of the infection, and its impact  
96 on the structure of the network of commercial movements.

## 97 **Data and methods**

### 98 *Cattle movement network*

99 The dataset used for this study corresponded to an extraction from the French national bovine identifi-  
100 cation database (BDNI). It concerned all cattle herds in Brittany (a French region) that sold or bought  
101 at least one animal during the year 2014. This set of 21,548 herds is referred to as the ‘metapopulation’  
102 thereafter. The database also included commercial exchanges as well as demographic events, all of which  
103 were referred to as ‘movements’ hereafter. Three types of commercial exchanges were considered: (i)  
104 ‘internal movements’ had an origin and a destination among the herds in the dataset, (ii) ‘imports’ had  
105 only a destination in the dataset and (iii) ‘exports’ had only an origin in the dataset. They represented  
106 respectively 64%, 16% and 20% of the commercial exchanges involving at least one herd of the dataset.  
107 Each commercial exchange of animals was assumed to take place directly from one herd to another, ne-  
108 glecting intermediaries. This means that markets and sorting centres were not considered for this study.  
109 They differ from herds in that they tend to concentrate a large number of animals, but for a limited  
110 period of time (less than a day for markets, a few days for sorting centres). Two types of demographic  
111 events were considered: (iv) births had only a destination, corresponding to the herd where the animal  
112 was born, and (v) deaths had only an origin, corresponding to the herd where the animal died.

113 The dataset was represented as a network with herds and internal movements corresponding to the  
114 vertices and edges, respectively. This network was (i) dynamic, i.e. movements were characterized by  
115 the date at which they occurred, (ii) weighted, i.e. a single edge represented the set of all movements  
116 from herd  $A$  to herd  $B$ , with a weight corresponding to the number of movements, and (iii) directed,  
117 i.e. movements from herd  $A$  to herd  $B$  were accounted for separately from movements from herd  $B$  to  
118 herd  $A$ . The network therefore included 21,548 vertices and 100,088 edges. The total number of internal  
119 movements over 2014 was 206,640, thus the average edge weight was 2.06.

### 120 *Epidemiological model: within and between-herd dynamics and infection settings*

121 The model developed aimed to simulate pathogen transmission within herds, and infection spread between  
122 herds through cattle movements. A full description of the model is available in Supplementary material 1.  
123 The model is stochastic in discrete time – each time-step corresponding to a day of 2014 – and in discrete  
124 space – by integrating the network of herds and movements described above. Commercial exchanges and

125 demography were data-based: movement  $m$  was characterized by its origin  $O_m$ , its destination  $D_m$ , its  
126 date according to the dataset  $T_m^*$  and the date at which it was simulated  $T_m$ . By default, movements were  
127 simulated according to the dataset, i.e.  $T_m = T_m^*$ . Within-herd dynamics were based on a SIRS model  
128 with three parameters: the infection rate  $\beta$ , the recovery rate  $\gamma$  – therefore the average infection duration  
129 was  $1/\gamma$  – and the rate of return to susceptibility  $\delta$ . At each time-step  $t$ , herd  $h$  was characterized  
130 by its number of susceptible, infected and recovered individuals, noted respectively  $S_h(t)$ ,  $I_h(t)$  and  
131  $R_h(t)$ . The total herd size  $N_h(t)$  was defined as the sum of these three values and infection prevalence as  
132  $P_h(t) = I_h(t)/N_h(t)$ .

133 Each simulated infection began with an initial outbreak in a metapopulation without infection, i.e.  
134 with only susceptible individuals. At  $t = t_I$ , the date of the outbreak, 10% of all herds in the metapopu-  
135 lation were infected, by replacing 1 susceptible individual with 1 infected individual in each of the herds.  
136 The probability of a herd being part of this 10% was proportional to the number of imports in the herd  
137 according to the 2014 dataset. The rationale was that herds receiving the most individuals from herds  
138 outside of the metapopulation were the most likely to introduce a new infection.

139 Two types of infections were considered for the study: epidemic and endemic. An infection was  
140 defined as 'epidemic' if it started at the outbreak, i.e. if  $t_0 = t_I$ . The initial state of the infection was  
141 then as described above. An infection was defined as 'endemic' if its start date was five years after the  
142 outbreak, i.e.  $t_0 = t_I + 1825$  days. The initial state of infection was then the result of a five-year infection,  
143 simulated using the same epidemiological model and an extraction from the BDNI over Brittany between  
144 01/01/2009 and 31/12/2013. Endemic simulations for which the infection went extinct before  $t_0$  were  
145 discarded, so that only initial states that were not disease-free were considered.

#### 146 *Developed rewiring algorithm*

147 The algorithm developed aimed at preventing movements of cattle from high-prevalence herds to low-  
148 prevalence herds. Its functioning was based on prevalence classes, numbered from 1 to  $c$ . Class  $i$  corre-  
149 sponded to prevalences between  $b_i$  and  $b_{i+1}$ , with the lowest boundary  $b_1 = 0$  and the highest boundary  
150  $b_{c+1} = 1$ . Each herd was assigned a 'real' and an 'observed' prevalence status, corresponding to one of  
151 these classes. The real prevalence status  $V_h^r(t)$  of herd  $h$  at time  $t$  was equal to the prevalence class  $i$  if  
152  $P_h(t) \in [b_i; b_{i+1}[$ , with  $V_h^r(t) = c$  if  $P_h(t) = 1$ . The observed prevalence status was updated periodically,  
153 every  $q$  time-step. If the real status of herd  $h$  was observed at time  $t_{obs}$ , then its observed status  $V_h^o(t)$   
154 remained the same for  $q$  time-steps, i.e.  $V_h^o(t) = V_h^r(t_{obs})$  for any  $t_{obs} \in [t; t + q[$ . No additional errors on  
155 the status were assumed, so that  $V_h^r(t)$  always corresponded to the correct prevalence class.

## 156 *Sequential rewiring*

157 The algorithm was executed at each time-step, before the simulation of the epidemiological model. Sup-  
158 plementary material 2 describes its functioning for a single time-step in pseudo-code. First, the algorithm  
159 defined all possible quadruplets of prevalence classes  $\{c_{OR}, c_{DR}, c_{ON}, c_{DN}\}$ , so that  $1 < c_{ON} \leq c_{DR} <$   
160  $c_{OR} \leq c_{DN} < c$ . The quadruplets were arranged primarily in ascending order of  $c_{DR}$ , secondarily in  
161 descending order of  $c_{OR}$ , thirdly in ascending order of  $c_{ON}$  and fourthly in descending order of  $c_{DN}$ . The  
162 algorithm followed this order, which ensured that no potential rewiring was missed. For each quadruplet,  
163 the algorithm selected two lists of internal movements set to occur at time  $t$ , based on the status of their  
164 origin and destination. A movement  $mR$  was in the first set if  $V_{O_{mR}}^o(t) = c_{OR}$  and  $V_{D_{mR}}^o(t) = c_{DR}$ . This  
165 movement was considered ‘at risk’ because, as  $c_{OR} > c_{DR}$ , the observed prevalence status of their origin  
166 was greater than that of their destination. A movement  $mN$  was in the second set if  $V_{O_{mN}}^o(t) = c_{ON}$   
167 and  $V_{D_{mN}}^o(t) = c_{DN}$ . This movement was considered ‘normal’, i.e. not at risk, since  $c_{ON} < c_{DN}$ . For  
168  $k$  the size of the shortest of the two movement sets, the algorithm permuted the origins of the first  $k$   
169 movements of each set, so that  $V_{O_{mR}}^o(t) = c_{ON}$  and  $V_{O_{mN}}^o(t) = c_{OR}$ . Since  $c_{OR} \leq c_{DN}$  and  $c_{ON} \leq c_{DR}$ ,  
170 neither movement was at risk after the permutation.

171 Once permutations were performed for each quadruplet, the management of remaining movements at  
172 risk, i.e. whose origin had a greater observed prevalence status than their destination, depended on two  
173 parameters: the maximal delay  $\Delta_{MAX}$  and the prohibition of movements at risk. Remaining movement  
174  $m$  was postponed, i.e.  $T_m$  was increased by 1, if  $T_m - T_m^* < \Delta_{MAX}$ . Otherwise, it was tagged as  
175 ‘problematic’. If movements at risk were not completely prohibited, problematic movement  $m$  would not  
176 be modified further. If they were,  $m$  would be replaced by an import with  $D_m$  as its destination and  
177 by an export with  $O_m$  as its origin. Overall, four algorithm parameters had to be defined *a priori*: the  
178 number of classes  $c$ , the update period  $q$ , the maximal delay  $\Delta_{MAX}$  and whether the movements at risk  
179 were prohibited.

## 180 *Simulations*

181 Simulations were performed on the dataset between 01/01/2014 (defined as  $t = 0$ ) and 01/01/2015  
182 ( $t = 365$ ). Different epidemiological settings were explored by manipulating the SIRS model parameters  
183 ( $\beta$ ,  $\gamma$  and  $\delta$ ) and infection type (epidemic or endemic). Two clustering analyses were performed on  
184 the preliminary simulations to define six epidemiological settings (Supplementary material 3): weak,  
185 moderate and strong epidemic settings and weak, moderate and strong endemic settings (Fig. S2).

186 The effectiveness of the algorithm was tested by running simulations with  $3 \times 3 \times 3 \times 2$  combinations  
187 of the algorithm parameters, respectively (i) the number of prevalence classes  $c$  (2, 3 or 4 classes), (ii) the  
188 update period  $q$  (1, 28 or 91 days), the maximum delay  $\Delta_{MAX}$  (1, 3 or 7 days) and (iv) the prohibition of  
189 movements at risk (yes or no). Each combination, as well as a control without rewiring, were simulated

| Outcomes related to | Notation      | Description                                                      |
|---------------------|---------------|------------------------------------------------------------------|
| Algorithm           | $n_{rew}(t)$  | Number of movements rewired at time $t$                          |
|                     | $n_{del}(t)$  | Number of delayed movements at time $t$                          |
|                     | $n_{prob}(t)$ | Number of problematic movements at time $t$                      |
|                     | $n_{risk}(t)$ | Number of movements at risk at time $t$                          |
|                     | $n_{err}(t)$  | Number of movements undetected as at risk at time $t$            |
| Infection           | $n_{inf}$     | Number of herd infections                                        |
|                     | $n_{ext}$     | Number of herds in which the infection goes extinct              |
|                     | $a_{dur}$     | Average duration of infection                                    |
|                     | $c_{inc}(t)$  | Cumulated incidence at time $t$                                  |
|                     | $n_{herd}(t)$ | Number of infected herds at time $t$                             |
|                     | $n_{ind}(t)$  | Number of infected individuals in the metapopulation at time $t$ |
|                     | $a_{prev}(t)$ | Average prevalence in the infected herds at time $t$             |
| Network             | $n_{SCC}$     | Number of strongly connected components                          |
|                     | $max_{SCC}$   | Size of the largest strongly connected component                 |
|                     | $ind_h$       | In-degree of herd $h$                                            |
|                     | $outd_h$      | Out-degree of herd $h$                                           |

Table 1: List of the outcomes computed from the simulations. The infection-related outcomes were computed for each simulation separately. The algorithm and network-related ones were computed for each simulation with the algorithm.

190 100 times for each of the six epidemiological settings.

191 Preliminary simulations were also carried out for each epidemiological setting between 01/01/2009  
192 ( $t = -1825$ ) and 31/12/2013 ( $t = -1$ ), with an initial outbreak at  $t_I = -1825$ . On the one hand,  
193 the number of susceptible, infected and recovered individuals of each herd at  $t = -1$  were used as the  
194 starting numbers for the endemic simulations (starting at  $t = 0$ ). On the other hand, the boundaries  
195 of the prevalence classes  $b_i$  used by the algorithm were set as quantiles of the distribution of prevalence  
196 values. If fewer than  $1/c$  herds had a null prevalence,  $b_i$  was the  $((i - 1)/c)^{th}$  quantile of the distribution.  
197 If it was greater than  $1/c$ ,  $b_1 = b_2 = 0$  and  $b_i$  was the  $((i - 2)/(c - 1))^{th}$  quantile of the distribution.

### 198 *Outcomes and analyses of numerical explorations*

199 The simulations outcomes are listed in Table 1. They were related either (i) to the functioning of the  
200 algorithm, (ii) to the infection or (iii) to the network of internal movements modified by the algorithm.

201 The algorithm-related outcomes  $n_{rew}(t)$ ,  $n_{del}(t)$  and  $n_{prob}(t)$  were computed each time-step after  
202 rewiring, while  $n_{risk}(t)$  and  $n_{err}(t)$  were computed before. These latter outcomes were computed by  
203 using the real prevalence status of the herds, rather than the observed ones. A movement  $m$  was included  
204 in  $n_{risk}(t)$  if  $V_{O_m}^r(t) > V_{D_m}^r(t)$ , and also included in  $n_{err}(t)$  if  $V_{O_m}^o(t) \leq V_{D_m}^o(t)$  at the same time. The  
205 proportion of undetected movements at risk was computed on a weekly basis, to account for intra-week  
206 variability in the number of livestock movements. Over week  $w$ , this proportion  $p_{err}(w)$  was :

$$p_{err}(w) = \frac{\sum_{t=7(w-1)+1}^{7w} n_{err}(t)}{\sum_{t=7(w-1)+1}^{7w} n_{risk}(t)}.$$

207 The Spearman's correlation coefficient  $\rho$  between  $p_{err}(w)$  and the number of weeks since last update

208 (from 1 to 4 weeks if  $q = 28$  days, from 1 to 13 weeks if  $q = 91$  days) was also computed to assess the  
209 relationship between errors in herd prevalence status and time. The Spearman's coefficient was preferred  
210 because it did not assume any particular distribution of the involved variables.

211 The impact of the algorithm on the infection dynamic was estimated through  $c_{inc}(t)$ , i.e. the cu-  
212 mulated number of herds newly infected over the simulation. The variations in  $n_{herd}(t)$  and  $n_{ind}(t)$   
213 over time are also presented in Supplementary material 4. Besides, the overall impact of the algorithm  
214 on the infection was assessed using a global multivariate sensitivity analysis, following Lamboni et al.  
215 (2011) and using the *multisensi* package of the *R* software (Bidot et al., 2018). This method allows to  
216 perform a sensitivity analysis on a multivariate output. For this analysis, twelve variables were derived  
217 from the infection-related outcomes. The three outcomes computed once per simulation  $n_{inf}$ ,  $n_{ext}$  and  
218  $a_{dur}$  were used as such. In addition, the maximum, minimum and final values over the whole period  
219 simulated (respectively noted  $max(u(t))$ ,  $min(u(t))$  and  $u(365)$  for outcome  $u(t)$ ) of  $n_{herd}(t)$ ,  $n_{ind}(t)$  and  
220  $a_{prev}(t)$  were also computed. The analysis included a principal component analysis (PCA) on the scaled  
221 variables, which were used as the multivariate output for the analysis. The analysis allowed to compute  
222 two generalised sensitivity indices (GSI) for each algorithm parameter, which were weighted means of  
223 the sensitivity indices over all the dimensions of the PCA: the total index (tGSI) including interactions  
224 with other parameters, and the first-order index (mGSI), not including them. The first principal compo-  
225 nent of the PCA was also used to assess the distribution of the simulations depending on the algorithm  
226 parameters.

227 The network-related outcomes were based on an static view of the network aggregating all the internal  
228 movements performed during the simulation, from  $t = 0$  to  $t = 365$ . Therefore, they took into account the  
229 rewiring performed by the algorithm, and the potential removal of problematic movements if movements  
230 at risks were completely prohibited. The outcomes recorded for the modified networks were compared to  
231 the same metrics for the original network defined by the 2014 dataset. The strongly connected components  
232 – from which  $n_{SCC}$  and  $max_{SCC}$  were computed – corresponded to groups of vertices linked to each other  
233 by a directed path. The percentiles of the distributions of  $ind_h$  and  $outd_h$  of all herds in the static network  
234 were used to assess the in-degree and out-degree distributions, respectively.

## 235 Results

### 236 *Outcomes related to the algorithm*

237 The number of movements rewired varied greatly depending on the date of the outbreak. It was negligible  
238 in the epidemic settings, with 80% of simulations with a total of rewired movements between 192 (fewer  
239 than 0.1% of all movements) and 2250 (1.1%). However, it was larger in the endemic settings, with  
240 80% of simulations with between 17,344 (8.4% of all movements) and 33,640 (16.3%) movements rewired.



241 Besides, increasing the value of  $\Delta_{MAX}$  logically increased the number of delayed movements (which was  
 242 0 by definition for  $\Delta_{MAX} = 0$ ) and decreased the number of problematic movements. In the endemic  
 243 settings, the problematic movements represented a small proportion of the movements detected as high  
 244 risk (median: 5.4%, 9<sup>th</sup> decile: 17.4%). In the epidemic settings however, they represented a larger part  
 245 (median: 14.3%, 9<sup>th</sup> decile: 59.7%), although their absolute numbers remained low (median: 129, 9<sup>th</sup>  
 246 decile: 651). Because of the overwhelming number of initially non-infected herds in these simulations, the  
 247 movements at risk were likely more difficult to rewire, and thus more likely to be tagged as problematic  
 248 by the algorithm.

249 Increasing the herd status update period  $q$  was not associated with a decrease in the number of  
 250 rewiring events (Fig. 1A, 1B). The value of  $q$  was even rather positively correlated with the number  
 251 of rewiring events in epidemic settings. This suggests that the algorithm performed more erroneous  
 252 rewiring as  $q$  increased. This was confirmed by the distributions of Spearman's correlation coefficient  
 253 between  $p_{err}(w)$  and the number of weeks since last update  $\rho$  with  $q = 91$  days (Fig. 1D), in endemic  
 254 settings (80% of values of  $\rho$  between -0.01 and 0.50) and in epidemic settings (80% of values of  $\rho$  between  
 255 0.39 and 0.75). This was also somewhat the case with  $q = 28$  days (1C), although the correlation were  
 256 weaker, in endemic (80% of values of values between -0.09 and 0.79) as well as in epidemic settings (80%  
 257 of values of values between -0.05 and 0.34).

258 The average proportions of undetected movements at risk  $p_{err}(w)$  all tended to increase with the

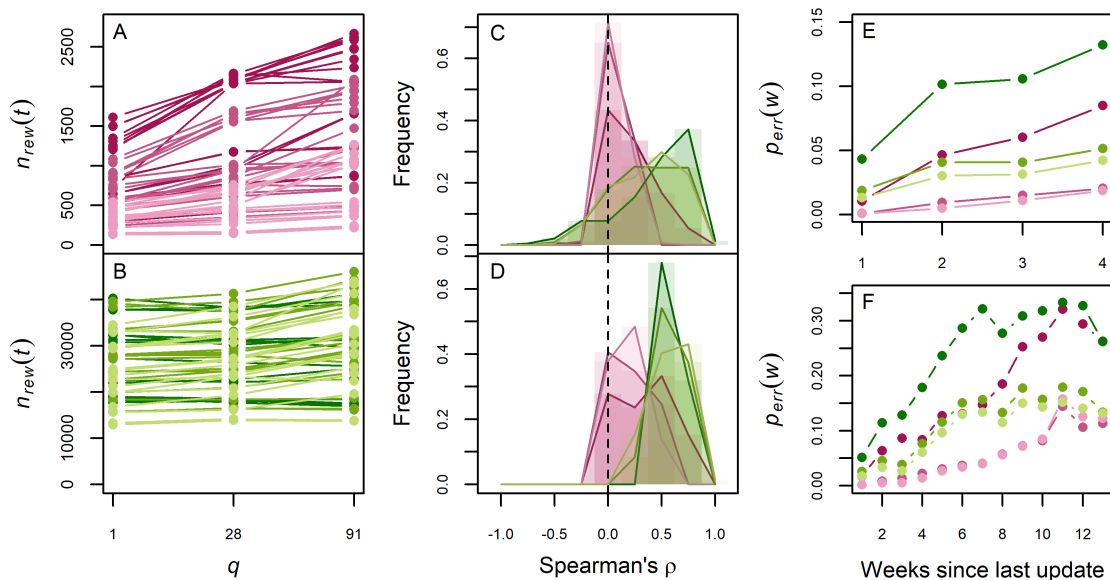

Figure 1: Impact of the update period  $q$  on the undetected movements at risk, in epidemic (magenta) or endemic settings (green), weak (light), moderate (medium) or strong (dark). First column: total number of rewiring events as a function of the update frequency  $q$ , averaged over all simulations for a same algorithm parameter combination, in epidemic (A) and endemic settings (B). Second column: distribution of Spearman's correlation coefficients ( $\rho$ ), with  $q = 28$  days (C) and  $q = 91$  days (D). Third column: average proportion of undetected movements at risk  $p_{err}(w)$  as a function of the number of weeks since the last update, with  $q = 28$  days (E) and  $q = 91$  days (F).

259 number of weeks since the last update  $w$  (Fig. 1E, 1F). This increase was systematically greater for the  
 260 largest value of  $q$ , up to  $p_{err}(w) = 0.3$ . However, they also appeared to have reached a plateau after  
 261 10 weeks. This suggests that a further increase in the update period  $q$  would not strongly increase the  
 262 proportion of undetected movements at risk. As for Spearman's correlation coefficient  $\rho$ , the increase was  
 263 greater in endemic settings than in epidemic settings.

#### 264 *Outcomes related to the infection*

265 Comparison of the results with and without rewiring showed the overall effectiveness of the algorithm  
 266 in containing the infection (Fig. 2). Regardless of the epidemiological setting and the combination of  
 267 parameters considered,  $c_{inc}(t)$  remained systematically lower after rewiring. The algorithm was partic-  
 268 ularly effective in weak and moderate epidemic settings, where very few herds were infected during the  
 269 year. In other epidemiological settings, the impact of the algorithm varied more strongly depending on  
 270 the scenario considered. Results for  $n_{herd}(t)$  and  $n_{ind}(t)$  are presented in Supplementary material 4.  
 271 The algorithm prevented the increase in the number of infected herds in the epidemic setting and even  
 272 decreased their number in an endemic setting (Fig. S3). However, it had little impact on the number of  
 273 infected individuals (Fig. S4).

274 The sensitivity analysis showed differences in the relative importance of the algorithm parameters on  
 275 the reduction of the infection (Fig. 3). Three different patterns of sensitivity to the algorithm parameters  
 276 were observed. Firstly, simulations in weak and moderate epidemic settings exhibited an overwhelming

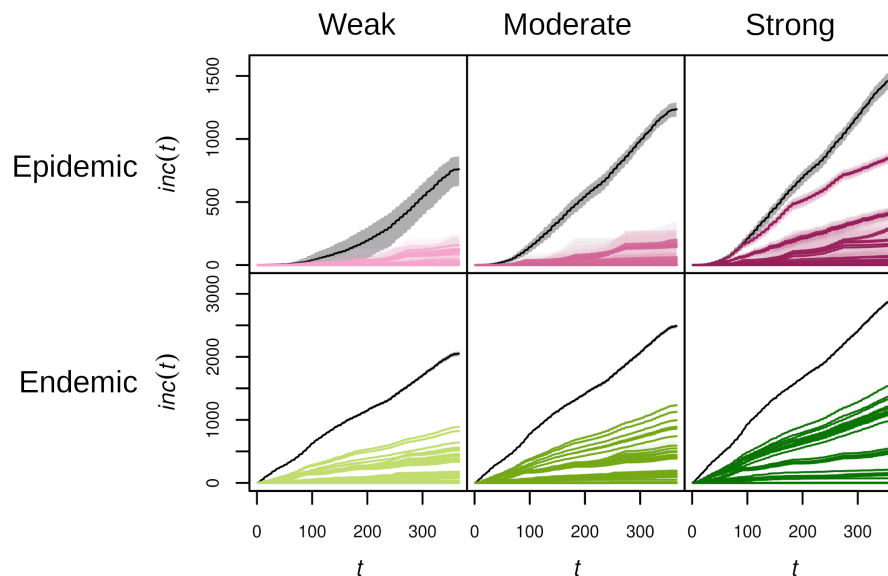

Figure 2: Cumulated incidence  $c_{inc}(t)$ , in number of herd infections, as a function of time ( $t$ , in days), for simulations with (colour) or without rewiring (black), in epidemic (1<sup>st</sup> row, magenta) or endemic settings (2<sup>nd</sup> row, green), weak (1<sup>st</sup> column, light), moderate (2<sup>nd</sup> column, medium) and strong (3<sup>rd</sup> column, dark). Each combination of algorithm parameters is represented by its mean over the repetitions (solid line) and an interval of 80% of simulations (envelope).

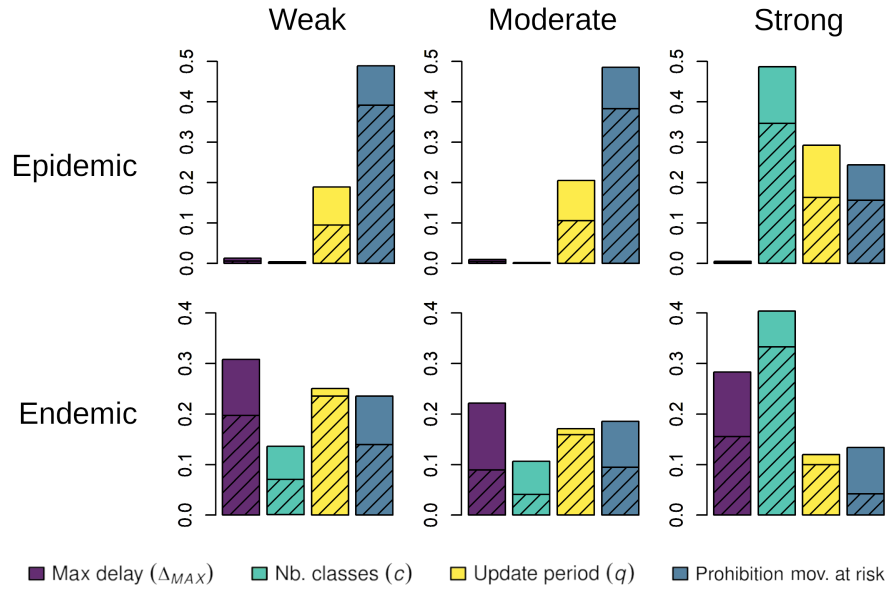

Figure 3: Generalised sensitivity indices (GSI) of the maximum delay  $\Delta_{MAX}$  (purple) the number of prevalence classes  $c$  (cyan), the update period  $q$  (yellow) and the prohibition of movements at risk (blue), in epidemic (1<sup>st</sup> row) or endemic settings (2<sup>nd</sup> row), weak (1<sup>st</sup> column), moderate (2<sup>nd</sup> column) and strong (3<sup>rd</sup> column). The total indices (tGSI) are in solid colour and the first-order indices (mGSI) are hatched.

277 sensitivity to the prohibition of movements at risk. Secondly, those in strong epidemic or endemic  
 278 exhibited a strong sensitivity to the number of prevalence classes  $c$ . Finally, those in weak and moderate  
 279 endemic settings exhibited a more balanced sensitivity to all parameters, with a substantial difference  
 280 between total and first-order indices for the maximum delay  $\Delta_{MAX}$ , the number of classes and the  
 281 prohibition of movements at risk. These differences suggest an interaction between the three algorithm  
 282 parameters. Besides, simulations for every epidemiological setting were somewhat sensitive to the update  
 283 period  $q$ .

284 The PCA performed as a first step of the sensitivity analysis was used to explore further the way  
 285 algorithm parameters impacted the infection-related outputs. Supplementary material 5 shows that the  
 286 first principal component of the PCA was globally positively correlated with outputs describing the extent  
 287 of the infection. The distributions of simulations along this first principal component therefore provided  
 288 information about the way algorithm parameter values affected the extent of the infection. Supplementary  
 289 material 6 presents these distributions for every epidemiological setting and every algorithm parameter,  
 290 while Fig. 4 displays some of the most relevant distributions. Fig. 4A shows that, in the weak epidemic  
 291 setting, simulations in which movements at risk were prohibited almost always scored lower on the first  
 292 principal component than those in which they were not. The distribution was similar in the moderate  
 293 epidemic setting (Fig. S6), which had similar sensitivity indices (Fig. 3). Interestingly, distributions  
 294 of simulations in strong epidemic or endemic settings showed that those with  $c = 2$  scored higher on  
 295 their respective first component, while those with  $c = 3$  and  $c = 4$  were not different (Fig. 4B, 4F). A

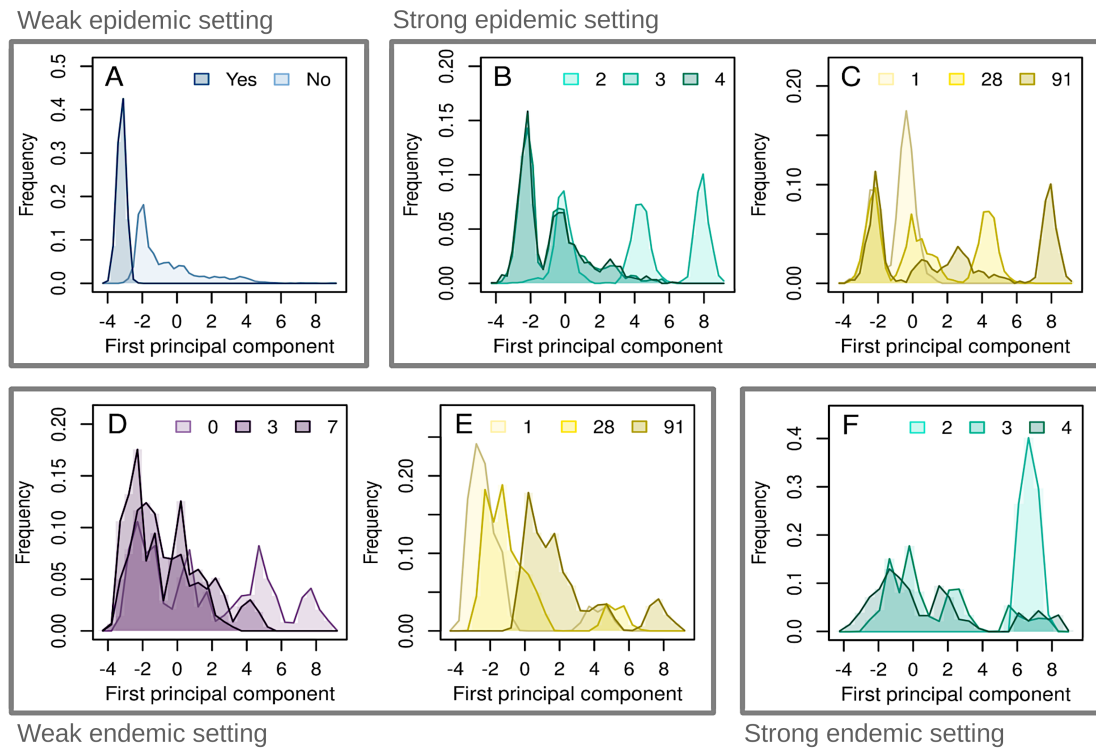

Figure 4: Distribution of the simulations on the first component of the PCA performed as a first step of the sensitivity analysis, in the weak epidemic setting (A), the strong epidemic setting (B, C), the weak endemic setting (D, E) and the strong endemic setting (F). The outputs are divided by maximum delay (purple, D), management of problematic movements (blue, A), number of prevalence classes (cyan, B and F) and herd status update period (yellow, C and E).

296 similar pattern was observed with the maximum delay in the weak endemic setting: only simulations  
 297 with  $\Delta_{MAX} = 0$  scored higher on the first principal component (Fig. 4D). In the strong epidemic setting,  
 298 the two high-scoring peaks in the distribution according to  $c$  (Fig. 4B) corresponded to the simulations  
 299 with  $q = 28$  and  $q = 91$  (Fig. 4C), highlighting an interplay between the number of classes  $c$  and the  
 300 update period  $q$ . No interplay between  $\Delta_{MAX}$  and  $q$  was visible in the weak endemic setting, although  
 301 Fig. 4E showed that the score of simulations on the first principal component was positively correlated  
 302 with  $q$ . Distributions in the moderate endemic setting were similar to those in the weak endemic setting  
 303 (Fig. S6).

#### 304 *Outcomes related to the movement network*

305 In endemic settings, rewiring movements increased the in- and out-degrees of the herds, i.e. the number  
 306 of different herds they were connected to (see Supplementary material 7). The increase was small but  
 307 systematic, for every algorithm parameter value (Fig. S7). In addition, the algorithm also affected the  
 308 strongly connected components of the network in endemic settings. On the one hand, the algorithm  
 309 reduced their number, all the more that the infection was strong (Fig. 5). On the other hand, the size of  
 310 the largest strongly connected component was increased in most, but not all simulations (64%, 67% and

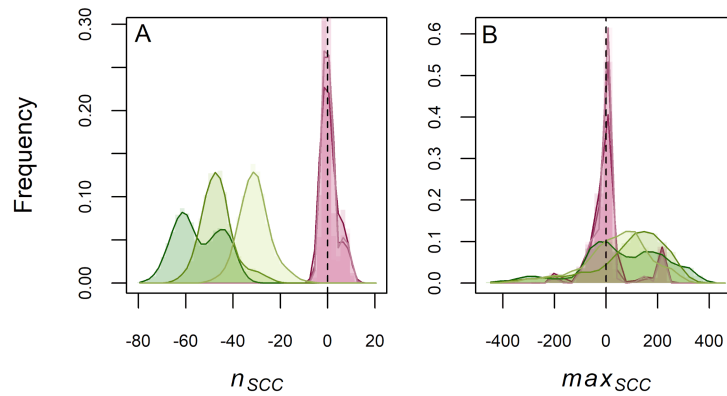

Figure 5: Distributions of the differences in number of strongly connected components (A,  $n_{SCC}$ ) and in size of the largest strongly connected component B,  $max_{SCC}$ ) between rewired networks and the original one from the dataset, for epidemic (magenta) and endemic (green) settings, weak(light), moderate (medium) and strong (dark).

311 80% of simulations in low, moderate and high endemic settings, respectively). It should be noted that  
312 the lesser impact of the algorithm on the network in epidemic settings can be explained by a number of  
313 rewiring events 25 times smaller on average than in endemic settings.

## 314 Discussion

315 This study aimed at developing an algorithm preventing movements at risk in order to reduce the extent of  
316 infections. Our results show that the rewiring algorithm we developed provided an improvement regardless  
317 of the disease parameters (infection rate  $\beta$ , recovery rate  $\gamma$  or rate of return to susceptibility  $\delta$ ), although  
318 differences were observed in its effectiveness between epidemiological settings. Indeed, infections in weak  
319 or moderate epidemic settings were almost completely prevented for each combination of parameters of  
320 the algorithm. In the other epidemiological settings, the impact of the algorithm was still significant,  
321 although weaker for some parameter combinations. However, the decrease in the number of infected herds  
322 was not necessarily coupled with a decrease in the number of infected individuals. This result highlights  
323 the tendency of the algorithm to concentrate infected individuals in the already infected herds. The  
324 algorithm therefore performed a trade-off that was beneficial to the metapopulation as a whole – with  
325 fewer infected herds – but detrimental to the smaller number of already infected herds, in such a situation  
326 where movement rewiring is not combined with complementary on-farm measures to reduce within-herd  
327 infection prevalence.

328 Sensitivity analysis on the infection-related outcomes revealed that all four parameters of the algorithm  
329 were important, but not for all epidemiological settings. Infections that were neither highly virulent  
330 nor already well established remained fully under control as long as movements at risk were completely  
331 prohibited, even if they could not be rewired. How these movements were managed seemed less important  
332 in other cases, in which infections could not be fully contained. The most virulent infections were strongly

333 influenced by the number of prevalence classes defined, which had to be greater than two for the algorithm  
334 to be effective. Because of the way boundaries between prevalence classes were computed, increasing the  
335 number of classes tended to limit the lowest prevalence class to (completely or almost) disease-free herds.  
336 Defining only two prevalence classes likely mixed those herds with somewhat infected ones, thus preventing  
337 the algorithm from effectively protecting infection-free herds and thereby limiting the spread  
338 of the infection. Other endemic infections rather depended on an interaction between the parameters,  
339 but they were especially impacted by the frequency at which the prevalence status of herds were updated,  
340 as were simulations with a strong epidemic setting.

341 The update period had a significant impact on the behaviour of the algorithm, making it more error-  
342 prone for high values of  $q$ . Indeed, the proportion of undetected movements at risk increased with the  
343 time since the last update, at least up to ten weeks. This result, together with the impact of  $q$  on  
344 infection-related outcomes, indicates that any increase in the update frequency of the status of herds  
345 should improve the effectiveness of the algorithm. This was not the case for other algorithm parameters.  
346 For instance, the sensitivity analysis showed that when  $\Delta_{MAX}$  played a role, reporting movements over  
347 only a few days – a rather minor constraint – was sufficient to improve the effectiveness of the algorithm.  
348 Similarly, considering only three prevalence classes reduced the extent of infections in strong epidemic  
349 or endemic settings. Conversely, increasing the frequency to daily updates was necessary for maximum  
350 algorithm effectiveness, but would likely entail significant costs. Bulk milk-based sampling systems could  
351 be used for some diseases in cattle (e.g. Garoussi et al., 2008, Humphry et al., 2012, with bovine viral  
352 diarrhoea), but daily prevalence estimation might be outright impossible for others.

353 Concentrating the prevalence estimation efforts on a few selected herds is a potential way to reduce the  
354 sampling costs associated with the algorithm while maintaining its effectiveness. Although the network  
355 metrics were not used to drive the algorithm itself, they could be useful for this selection. Indeed, it is  
356 expected that the central herds in the network, i.e. those through which a large proportion of animal  
357 movements pass, will play a more important role in the spread of infection (Rautureau et al., 2011, Natale  
358 et al., 2011). This rationale is notably the one used for rewiring in the study of Gates and Woolhouse  
359 (2015). Recently, Hoscheit et al. (2021) reviewed different centrality measures in the BDNI, while taking  
360 into account the dynamic nature of the movement network. Among them, the TempoRank index would  
361 for example be a good candidate for selecting a subset of herds to be specifically monitored and to which  
362 to apply the rewiring algorithm. By targeting specific movements from or to specific herds, the impact  
363 on the network structure would be minimal, while potentially keeping a substantial impact on disease  
364 spread risks.

365 It should be noted that the impact of the algorithm on the structure of the commercial network  
366 was already limited, as it targeted a few movements only: less than 20% of the movements for endemic  
367 infections and less than 2% of them for epidemic infections. Nevertheless, it seems that this rewiring

368 method tended to increase the overall connectedness of the herds during endemic infections. Indeed, the  
369 increases in degrees and size of the largest strong component indicate that the algorithm connected herds  
370 that were originally not so. These metrics are generally correlated with higher expected epidemic risks  
371 (Kiss et al., 2006, Dubé et al., 2009). This is however not the case in this context, as these changes  
372 result from a trade-off made by the algorithm to prevent the single simulated disease. However, such  
373 a rewiring in a real-world context would also have to take into account the potentially increased risks  
374 of other diseases, whose spread could be facilitated. The algorithm could be extended to assess several  
375 diseases at once, but the additional constraints would probably reduce its effectiveness.

376 For this study, the network-related outcomes concerned only internal movements, i.e. between herds  
377 located in Brittany. However, the simulations also took into account interactions with herds located  
378 outside Brittany. More precisely, 20% of all movements whose destination was in the metapopulation had  
379 an origin outside the metapopulation, and 25% of all movements whose origin was in the metapopulation  
380 had a destination outside of it. On the one hand, this confirms that the movements at risk that could not  
381 be rewired could probably be replaced by an import and an export if necessary, since those movements  
382 are already rather common. On the other hand, all imports were presumed to never be movements  
383 at risk, i.e. that the prevalence status of their origin was never higher than that of their destination.  
384 This assumption is not trivial, as it assumes that imports did not create greater infection risks than  
385 internal movements. In a real-life context, the additional risk because of imports would also have to be  
386 taken into account and possibly managed in another way. More generally, the proportion of movements  
387 with an origin outside of the metapopulation is expected to decrease when the number of herds in the  
388 metapopulation increase. Extending the use of such an algorithm to a national scale, rather than a single  
389 region, could therefore mitigate this problem.

390 The present study builds upon the results from Ezanno et al. (2021), and confirms the effectiveness  
391 of a rewiring method based on targeted movements beyond the specific case of bovine paratuberculosis.  
392 Indeed, the algorithm presented by Ezanno et al. (2021) was developed specifically to address the control  
393 of bovine paratuberculosis, notably characterized by an endemic status in France and a low detection  
394 rate. To do so, they used a specific age-structured epidemiological model (Camanes et al., 2018) and  
395 an algorithm calibrated to target the disease. This was also the case for instance of Mohr et al. (2018),  
396 which specifically targeted foot-and-mouth disease. Conversely, the present study aimed at assessing more  
397 comprehensively the effectiveness of the algorithm. Therefore, it was tested for different epidemiological  
398 settings – both endemic and epidemic – using a non-specific epidemiological model, and for broad range  
399 of parameter values. Ezanno et al. (2021) highlight the low effectiveness of rewiring for low evolving  
400 diseases, but our study shows its relevance in other types of infections.

401 Although the study here show the effectiveness of rewiring on historical data from the BDNI, the  
402 algorithm could also be used prospectively as part of decision-making tools. Indeed, the rewiring method

403 could work without any simulation of infection, if herd statuses were provided otherwise. Given these  
404 statuses and the potential movements to occur, the algorithm would also suggest necessary changes to  
405 prevent movements at risk. In this context, the implementation of these changes would also depend on  
406 the actual decision of the informed farmers. Unless rewiring is enforced, it is expected that constraints  
407 other than sanitary ones would affect movements, which would impact the effectiveness of the algorithm.  
408 Coupling it with a decision-making model could provide additional insight on this impact. In order to  
409 make it easier to use as part of such decision-making tools, the algorithm has been specifically designed  
410 to be able to include additional, different constraints. Additional criteria, e.g. concerning the breed or  
411 sex of the animals, could be added easily by providing the algorithm with movements for individuals in  
412 each category separately. Depending on their number, however, such criteria would reduce the rewiring  
413 possibilities of the algorithm, which could reduce its efficiency.

414 This study demonstrates the effectiveness of a rewiring method targeting specific movements to reduce  
415 infection risks. Our approach thus differs radically from that presented by Gates and Woolhouse (2015),  
416 as it also aims at generating minimal changes in the structure of the movement network. Although the  
417 algorithm was tested on a cattle movement network, it is applicable to a much wider range of networks  
418 in animal and plant populations, e.g. among seed exchange networks, which face similar infection risks  
419 (Jeger et al., 2007, Pautasso et al., 2010). While the need for controlled movements makes this method  
420 more relevant to agricultural systems, the spatial and temporal scales considered can also be adapted  
421 depending on the context. Indeed, the daily time-step and the region level were used here as they  
422 correspond to the BDNI data structure, but are not necessary for the algorithm to work. The usefulness  
423 of our rewiring method could therefore extend beyond cattle concerns, even though the effectiveness of  
424 the algorithm in other contexts remains to be tested.

## 425 **Funding**

426 This work was supported by the French National Agency for Research (*Agence nationale de la recherche*),  
427 project CADENCE [grant number ANR-368 16-CE32-0007].

## 428 **Declarations of interest**

429 None.

## 430 **Data statement**

431 The code for the algorithm, as well as additional scripts for formatting the data or running preliminary  
432 simulations and dummy test data, are freely available at <https://sourcesup.renater.fr/projects/pub-rewir->



433 algo/. The dataset used in the study is an extraction from the French national bovine identification  
434 database (BDNI), which is confidential, and therefore cannot be provided publicly.

## 435 References

436 P. Bajardi, A. Barrat, F. Natale, L. Savini, and V. Colizza. Dynamical patterns of cattle trade movements.  
437 *PLoS One*, 6(5):e19869, 2011. ISSN 1932-6203. doi: 10.1371/journal.pone.0019869.

438 F. Ball and T. Britton. Epidemics on networks with preventive rewiring. *arXiv preprint arXiv:2008.06375*,  
439 2020.

440 G. Beaunée, E. Vergu, and P. Ezanno. Modelling of paratuberculosis spread between dairy cattle farms  
441 at a regional scale. *Vet Res*, 46(1):1–13, 2015. ISSN 1297-9716. doi: 10.1186/s13567-015-0247-3.

442 G. Beaunée, E. Vergu, A. Joly, and P. Ezanno. Controlling bovine paratuberculosis at a regional scale:  
443 Towards a decision modelling tool. *J Theor Biol*, 435:157–183, 2017. doi: 10.1016/j.jtbi.2017.09.012.

444 C. Bidot, M. Lamboni, and H. Monod. Multisensi: Multivariate Sensitivity Analysis, 2018.

445 F. Biemans, R. B. Romdhane, P. Gontier, C. Fourichon, G. Ramsbottom, S. More, and P. Ezanno.  
446 Modelling transmission and control of Mycobacterium avium subspecies paratuberculosis within Irish  
447 dairy herds with compact spring calving. *Prev Vet Med*, 186:105228, 2021. ISSN 0167-5877. doi:  
448 10.1016/j.prevetmed.2020.105228.

449 T. Britton, D. Juher, and J. Saldaña. A network epidemic model with preventive rewiring: Comparative  
450 analysis of the initial phase. *Bull Math Biol*, 78(12):2427–2454, 2016. doi: 10.1007/s11538-016-0227-4.

451 K. Büttner, J. Krieter, A. Traulsen, and I. Traulsen. Static network analysis of a pork supply chain in  
452 Northern Germany—Characterisation of the potential spread of infectious diseases via animal move-  
453 ments. *Prev Vet Med*, 110(3-4):418–428, 2013. ISSN 0167-5877. doi: 10.1016/j.prevetmed.2013.01.008.

454 G. Camanes, A. Joly, C. Fourichon, R. Ben Romdhane, and P. Ezanno. Control measures to prevent the  
455 increase of paratuberculosis prevalence in dairy cattle herds: An individual-based modelling approach.  
456 *Vet Rec*, 49(1):1–13, 2018. doi: 10.1186/s13567-018-0557-3.

457 A. Courcoul and P. Ezanno. Modelling the spread of Bovine Viral Diarrhoea Virus (BVDV)  
458 in a managed metapopulation of cattle herds. *Vet Microbiol*, 142(1-2):119–128, 2010. doi:  
459 10.1016/j.vetmic.2009.09.052.

460 C. Dubé, C. Ribble, D. Kelton, and B. McNab. A review of network analysis terminology and its  
461 application to foot-and-mouth disease modelling and policy development. *Transbound Emerg Dis*, 56  
462 (3):73–85, 2009. ISSN 1865-1674. doi: 10.1111/j.1865-1682.2008.01064.x.

- 463 B. L. Dutta, P. Ezanno, and E. Vergu. Characteristics of the spatio-temporal network of cat-  
464 tle movements in France over a 5-year period. *Prev Vet Med*, 117(1):79–94, 2014. doi:  
465 10.1016/j.prevetmed.2014.09.005.
- 466 EU. Regulation (EC) No 1760/2000 establishing a system for the identification and registration of bovine  
467 animals and regarding the labelling of beef and beef products and repealing Council Regulation (EC)  
468 No 820/97, 2000.
- 469 P. Ezanno, M. Andraud, G. Beaunée, T. Hoch, S. Krebs, A. Rault, S. Touzeau, E. Vergu, and S. Widgren.  
470 How mechanistic modelling supports decision making for the control of enzootic infectious diseases.  
471 *Epidemics*, 32:100398, 2020. doi: 10.1016/j.epidem.2020.100398.
- 472 P. Ezanno, S. Arnoux, A. Joly, and R. Vermesse. Rewiring cattle trade movements helps to  
473 control bovine paratuberculosis at a regional scale. *Prev Vet Med*, page 105529, 2021. doi:  
474 10.1016/j.prevetmed.2021.105529.
- 475 M. T. Garoussi, A. Haghparast, and H. Estajee. Prevalence of bovine viral diarrhoea virus antibodies  
476 in bulk tank milk of industrial dairy cattle herds in suburb of Mashhad-Iran. *Prev Vet Med*, 84(1-2):  
477 171–176, 2008. doi: 10.1016/j.prevetmed.2007.12.016.
- 478 M. C. Gates and M. E. Woolhouse. Controlling infectious disease through the targeted ma-  
479 nipulation of contact network structure. *Epidemics*, 12:11–19, 2015. ISSN 1755-4365. doi:  
480 10.1016/j.epidem.2015.02.008.
- 481 M. Gilbert, A. Mitchell, D. Bourn, J. Mawdsley, R. Clifton-Hadley, and W. Wint. Cattle movements and  
482 bovine tuberculosis in Great Britain. *Nature*, 435(7041):491–496, 2005. doi: 10.1038/nature03548.
- 483 D. Green and R. Kao. Data quality of the cattle tracing system in Great Britain. *Vet Rec*, 161(13):  
484 439–443, 2007. ISSN 0042-4900. doi: 10.1136/vr.161.13.439.
- 485 D. M. Green, A. Gregory, and L. A. Munro. Small-and large-scale network structure of live fish movements  
486 in Scotland. *Prev Vet Med*, 91(2-4):261–269, 2009. doi: 10.1016/j.prevetmed.2009.05.031.
- 487 T. Gross, C. J. D. D’Lima, and B. Blasius. Epidemic dynamics on an adaptive network. *Phys Rev Lett*,  
488 96(20):208701, 2006. doi: 10.1103/PhysRevLett.96.208701.
- 489 A. Hidano, T. E. Carpenter, M. A. Stevenson, and M. C. Gates. Evaluating the efficacy of regionalisation  
490 in limiting high-risk livestock trade movements. *Prev Vet Med*, 133:31–41, 2016. ISSN 0167-5877. doi:  
491 10.1016/j.prevetmed.2016.09.015.
- 492 P. Hoscheit, É. Anthony, and E. Vergu. Dynamic centrality measures for cattle trade networks. *Appl*  
493 *Netw Sci*, 6(1):1–17, 2021. ISSN 2364-8228. doi: 10.1007/s41109-021-00368-5.

- 494 R. Humphry, F. Brülisauer, I. McKendrick, P. Nettleton, and G. Gunn. Prevalence of antibodies to  
495 bovine viral diarrhoea virus in bulk tank milk and associated risk factors in Scottish dairy herds. *Vet*  
496 *Rec*, 171(18):445–445, 2012. doi: 10.1136/vr.100542.
- 497 M. J. Jeger, M. Pautasso, O. Holdenrieder, and M. W. Shaw. Modelling disease spread and control in  
498 networks: Implications for plant sciences. *New Phytol*, 174(2):279–297, 2007. ISSN 0028-646X. doi:  
499 doi:10.1111/j.1469-8137.2007.02028.x.
- 500 R. R. Kao, L. Danon, D. M. Green, and I. Z. Kiss. Demographic structure and pathogen dynamics on  
501 the network of livestock movements in Great Britain. *Proc R Soc B*, 273(1597):1999–2007, 2006. doi:  
502 10.1098/rsif.2006.0129.
- 503 I. Z. Kiss, D. M. Green, and R. R. Kao. The network of sheep movements within Great Britain: Network  
504 properties and their implications for infectious disease spread. *J R Soc Interface*, 3(10):669–677, 2006.  
505 ISSN 1742-5689. doi: doi:10.1098/rsif.2006.0129.
- 506 M. Lamboni, H. Monod, and D. Makowski. Multivariate sensitivity analysis to measure global con-  
507 tribution of input factors in dynamic models. *Reliab Eng Syst Saf*, 96(4):450–459, 2011. doi:  
508 10.1016/j.res.2010.12.002.
- 509 W.-c. Liu, L. Matthews, M. Chase-Topping, N. J. Savill, D. J. Shaw, and M. E. Woolhouse. Metapopu-  
510 lation dynamics of Escherichia coli O157 in cattle: An exploratory model. *Journal of the Royal Society*  
511 *Interface*, 4(16):917–924, 2007. ISSN 1742-5689.
- 512 S. Mohr, M. Deason, M. Churakov, T. Doherty, and R. R. Kao. Manipulation of contact network  
513 structure and the impact on foot-and-mouth disease transmission. *Prev Vet Med*, 157:8–18, 2018. ISSN  
514 0167-5877. doi: 10.1016/j.prevetmed.2018.05.006.
- 515 M. Moslonka-Lefebvre, C. A. Gilligan, H. Monod, C. Belloc, P. Ezanno, J. A. Filipe, and E. Vergu. Market  
516 analyses of livestock trade networks to inform the prevention of joint economic and epidemiological  
517 risks. *J R Soc Interface*, 13(116):20151099, 2016. ISSN 1742-5689. doi: 10.1098/rsif.2015.1099.
- 518 F. Natale, A. Giovannini, L. Savini, D. Palma, L. Possenti, G. Fiore, and P. Calistri. Network analysis  
519 of Italian cattle trade patterns and evaluation of risks for potential disease spread. *Prev Vet Med*, 92  
520 (4):341–350, 2009. doi: 10.1016/j.prevetmed.2009.08.026.
- 521 F. Natale, L. Savini, A. Giovannini, P. Calistri, L. Candeloro, and G. Fiore. Evaluation of risk and  
522 vulnerability using a Disease Flow Centrality measure in dynamic cattle trade networks. *Prev Vet*  
523 *Med*, 98(2-3):111–118, 2011. doi: 10.1016/j.prevetmed.2010.11.013.

- 524 M. Nöremark, N. Håkansson, T. Lindström, U. Wennergren, and S. S. Lewerin. Spatial and temporal  
525 investigations of reported movements, births and deaths of cattle and pigs in Sweden. *Acta Vet*, 51(1):  
526 1–15, 2009. doi: 10.1186/1751-0147-51-37.
- 527 M. Nöremark, N. Håkansson, S. S. Lewerin, A. Lindberg, and A. Jonsson. Network analysis of cattle and  
528 pig movements in Sweden: Measures relevant for disease control and risk based surveillance. *Prev Vet*  
529 *Med*, 99(2-4):78–90, 2011. doi: 10.1016/j.prevetmed.2010.12.009.
- 530 M. Pautasso, M. Moslonka-Lefebvre, and M. J. Jeger. The number of links to and from the starting node  
531 as a predictor of epidemic size in small-size directed networks. *Ecol Complex*, 7(4):424–432, 2010. ISSN  
532 1476-945X. doi: doi:10.1016/j.ecocom.2009.10.003.
- 533 S. Piankoranee and S. Limkumnerd. Effect of local rewiring in adaptive epidemic networks. *Phys Lett A*,  
534 384(15):126308, 2020. ISSN 0375-9601. doi: 10.1016/j.physleta.2020.126308.
- 535 S. Rautureau, B. Dufour, and B. Durand. Vulnerability of animal trade networks to the spread of infec-  
536 tious diseases: A methodological approach applied to evaluation and emergency control strategies in  
537 cattle, France, 2005. *Transbound Emerg Dis*, 58(2):110–120, 2011. ISSN 1865-1674. doi: 10.1111/j.1865-  
538 1682.2010.01187.x.
- 539 M. C. Vernon. Demographics of cattle movements in the United Kingdom. *BMC Vet Res*, 7(1):1–16,  
540 2011. doi: 10.1186/1746-6148-7-31.
- 541 H.-X. Yang, Z.-X. Wu, and B.-H. Wang. Suppressing traffic-driven epidemic spreading by edge-removal  
542 strategies. *Phys Rev E*, 87(6):064801, 2013. doi: 10.1103/PhysRevE.87.064801.
